# Supplementary material
Source: publisher figshare collection journal article supplement (https://gsajournals.figshare.com/ndownloader/files/26016827)
Supplement: Supplementary file 1 [file 26016827]

**Table S2.** *In silico* analysis of phage phiC120 proteins with allergenic potential with sliding 80mer FASTA hits (FAO/WHO >35%).

| **Database Analysis** | **Result** |
| --- | --- |
| **Allergen FP v. 1.0** | Probable allergen |
| **AllerTOP v. 2.0** | Probable non-allergen |
| **Proinflam** | 33 epitopes |
| **SDAP Full-length FASTA** | 1 allergen: Amb a 4.0101, sequence GenBank CBK52317 (E score 1.7 e-03, 14.67 identity) |
| **AlgPred** | |
| Prediction by mapping of IgE epitope | Probable non allergen |
| MAST result | No hits |
| BLAST result of ARPs | No hits |
| Prediction by hybrid approach (SVMc+IgE epitope+ARPs BLAST+MAST) | non allergen-non allergen |
| **PREALw** | |
| FAO/WHO sequence alignment | Non allergen |
| FAO/WHO amino acids match | Non allergen |
| Motif-based | Non allergen |
